# Supplementary material for: Ferroelectric BiFeO3 modified PVDF-based electrolytes for high-performance lithium metal batteries
Source: Royal Society of Chemistry journal article supplement (doi:10.1039/d4ta03225j), 2024-01-01
Supplement: d4ta03225j1.pdf [file d4ta03225j1.pdf]

Electronic Supplementary Information

## **Ferroelectric BiFeO<sub>3</sub> modified PVDF-based electrolytes for high-performance lithium metal batteries**

Yanmei Wu, Hong Zhang, Yilin Xu, Zhiruo Tang, Zhicheng Li\*

School of Materials Science and Engineering, Central South University, Changsha 410083, China

Corresponding author: zhchli@csu.edu.cn

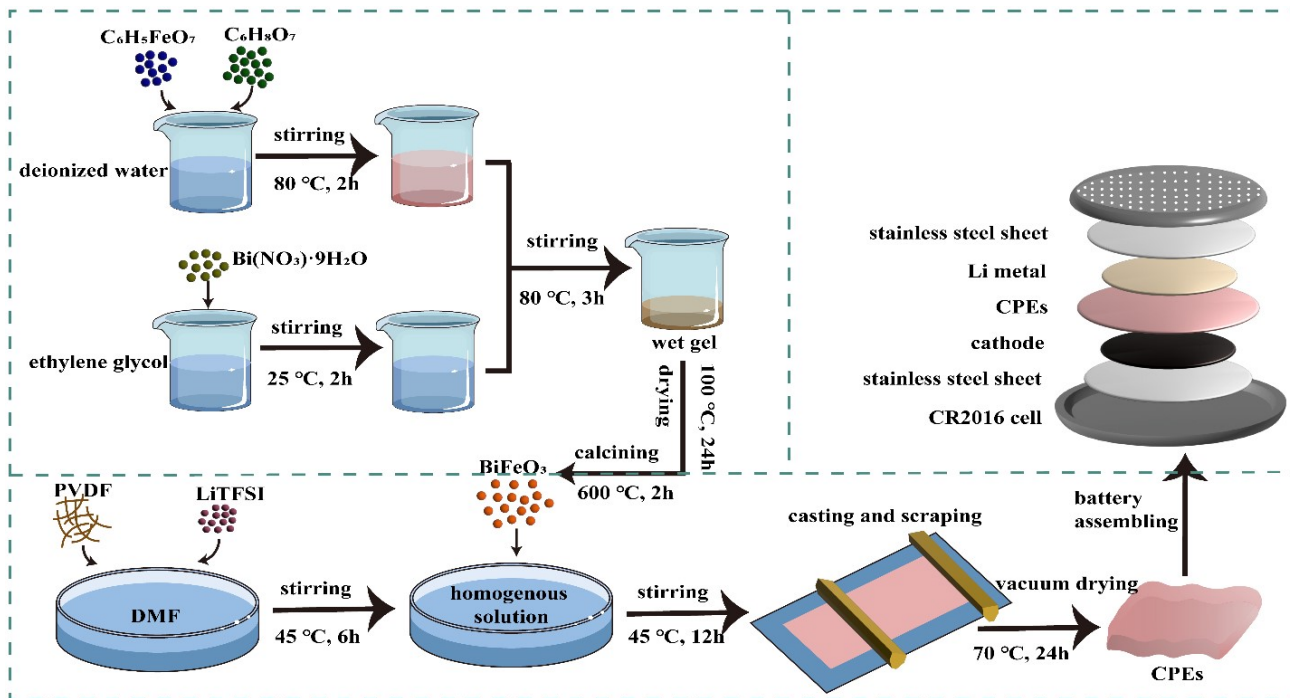

Fig. S1 Schematic diagram of the preparation process

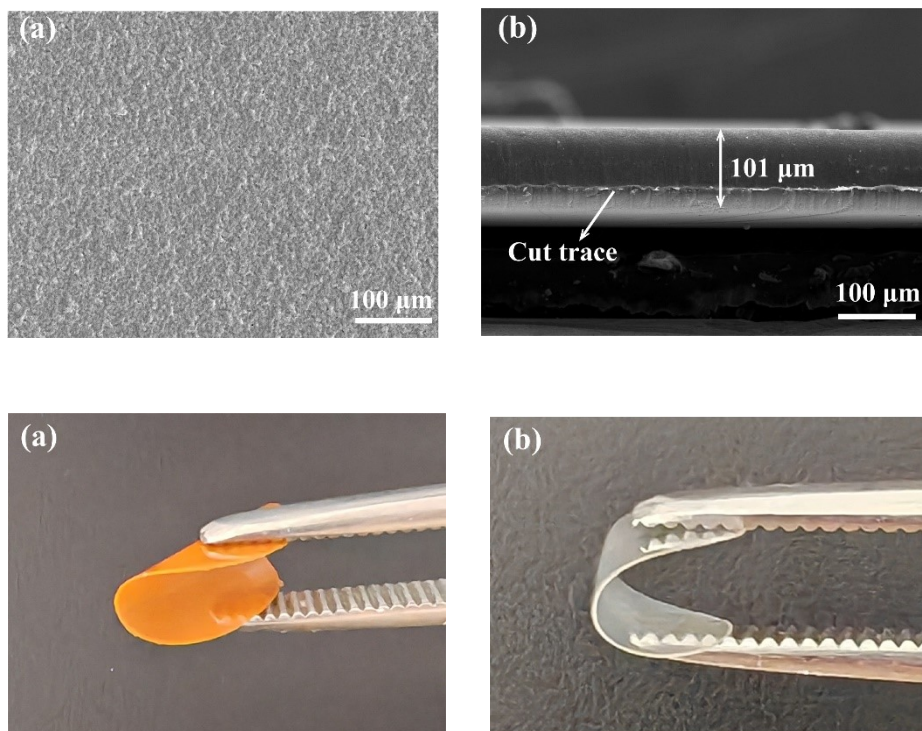

Fig. S2 SEM observation of PVDF film, (a) surface morphology, (b) cross-sectional view

Fig. S3 Optional images of PVDF-based films, (a) PVDF-5BFO, (b) PVDF

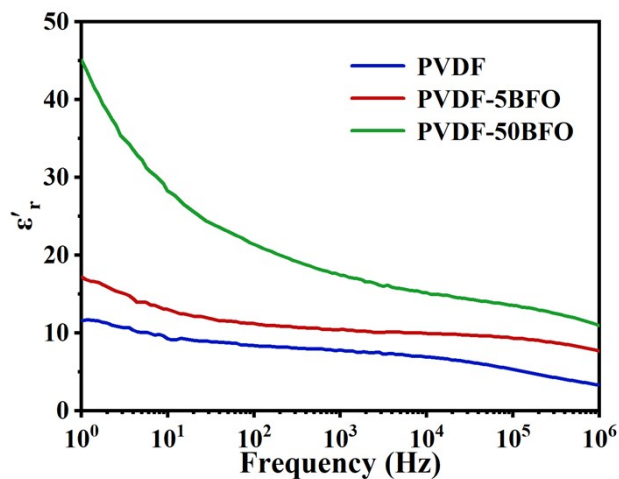

Fig. S4 Plots for frequency-dependent relative permittivity of PVDF-based films at 25 °C

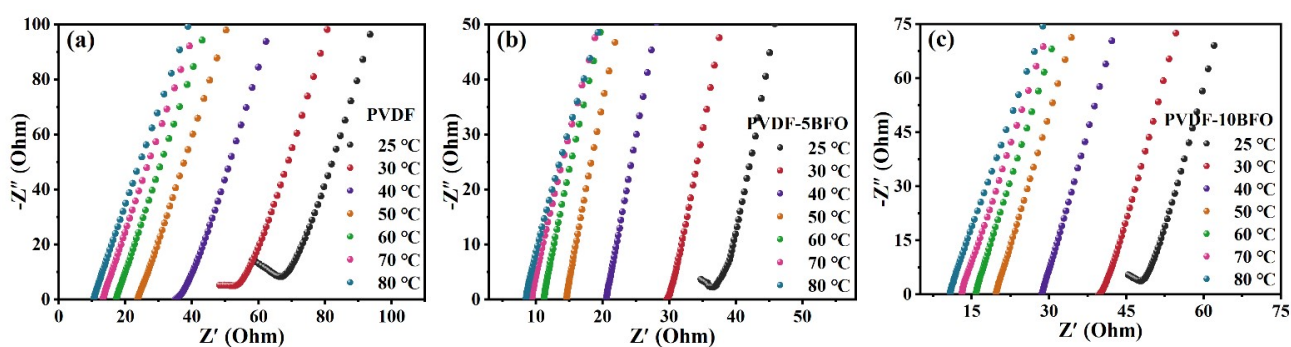

Fig. S5 Electrochemical impedance spectra of PVDF-based films at various temperatures, (a) PVDF, (b) PVDF-5BFO,

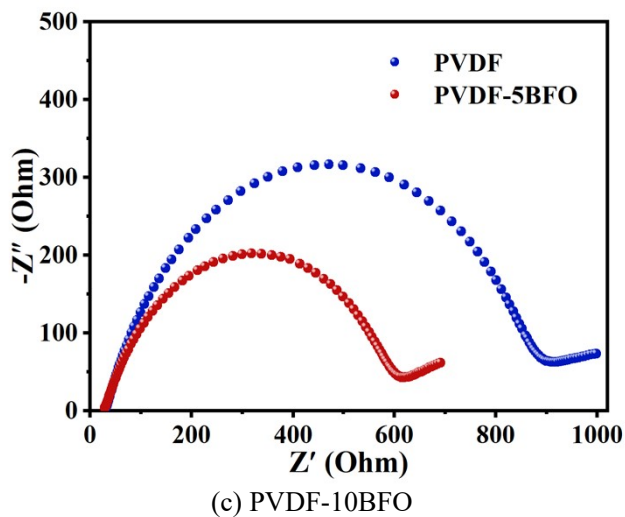

Fig. S6 Electrochemical impedance spectra of Li|CPE|Li batteries after 100 cycles

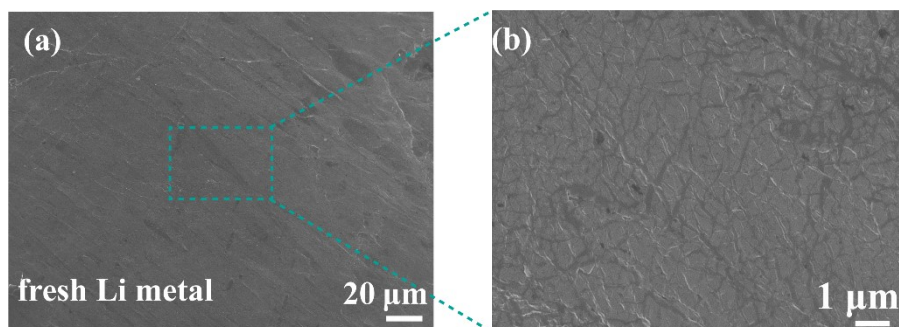

Fig. S7 SEM surface observation of fresh Li metal before cycling, (a) Li metal, (b) corresponding enlarged region

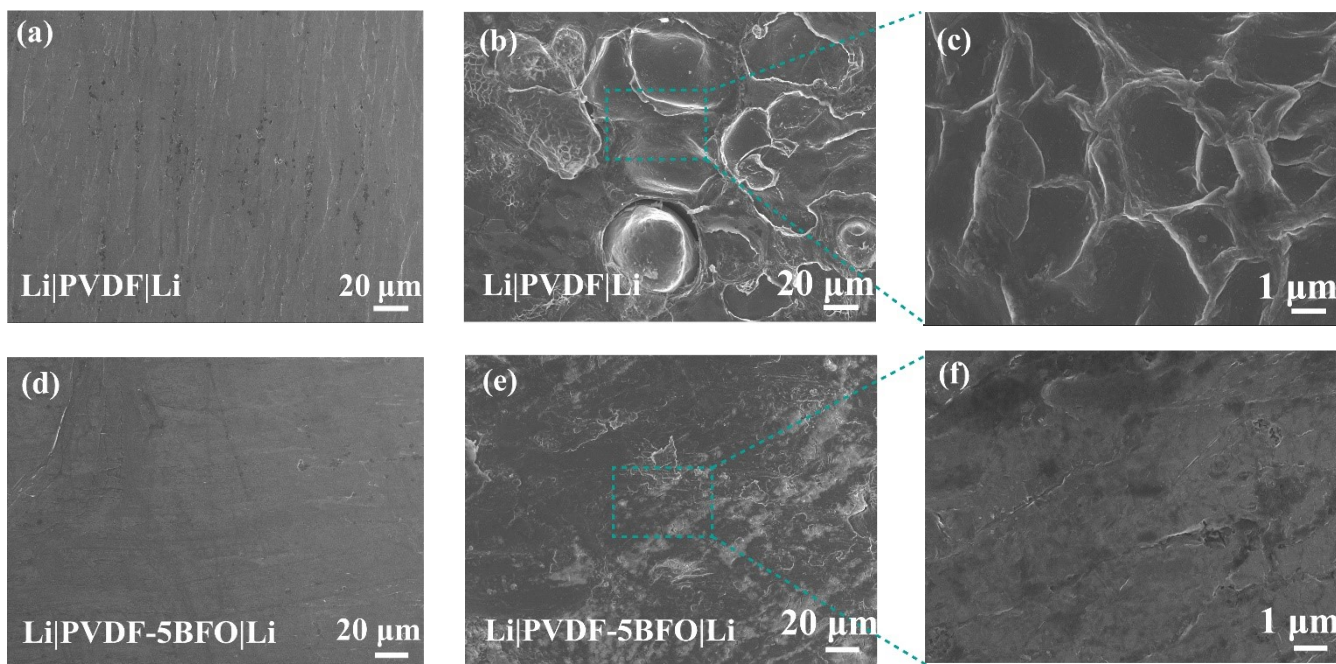

Fig. S8 SEM observation of the surfaces of Li-metals in symmetric Li|CPE|Li batteries after galvanostatic cycling, with two kinds of electrolytes, (a) PVDF as electrolyte and after 100 h, (b) PVDF as electrolyte after battery failure, (c) the corresponding enlarged Li metal region of Li|PVDF|Li, (d) PVDF-5BFO as electrolyte after 100 h, (e) PVDF-5BFO as electrolyte after 2500 h, (f) the corresponding enlarged Li metal region of Li|PVDF-5BFO|Li

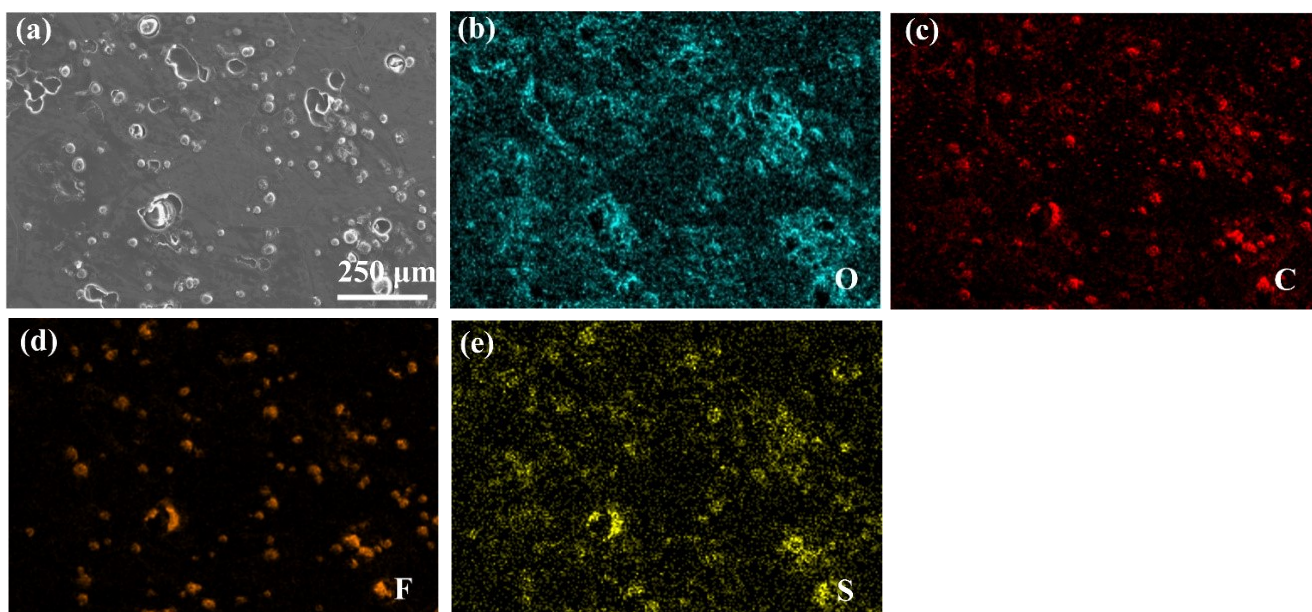

Fig. S9 Surface SEM image and corresponding EDS mapping of elemental distribution of cycled Li surface in Li|PVDF|Li battery, (a) surface SEM image, (b) O element, (c) C element, (d) F element, (e) S element

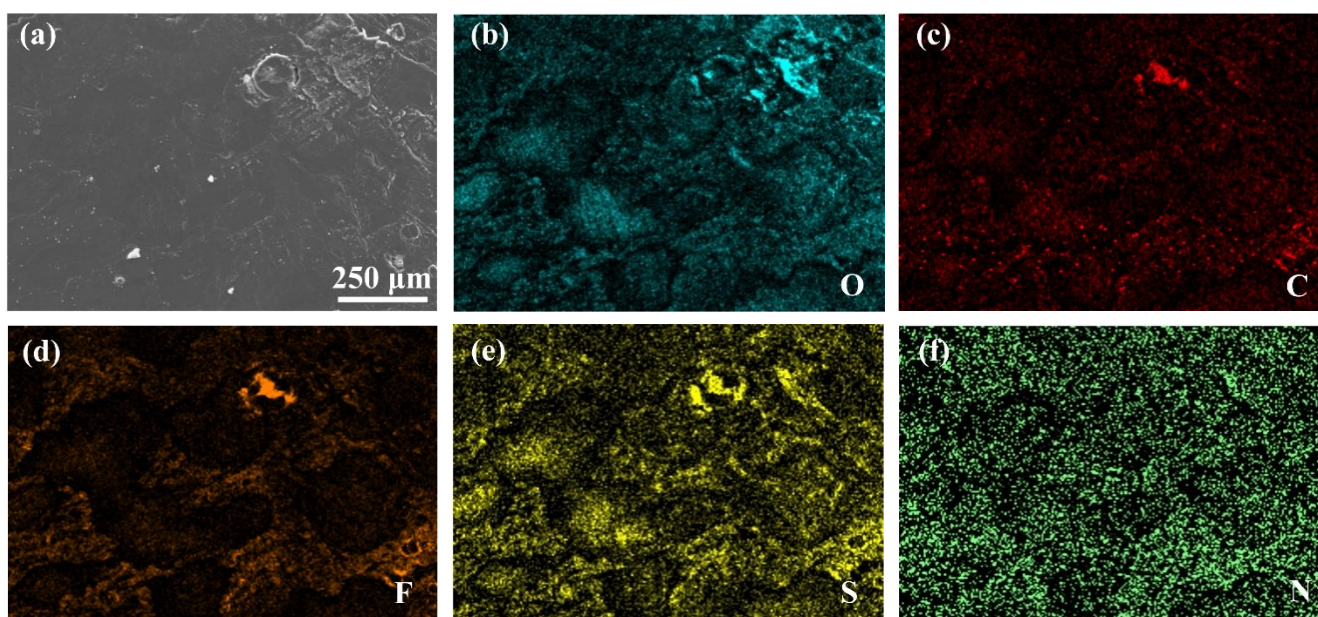

Fig. S10 Surface SEM image and corresponding EDS mapping of elemental distribution of cycled Li surface in Li|PVDF-5BFO|Li battery, (a) surface SEM image, (b) O element, (c) C element, (d) F element, (e) S element, (f) N element

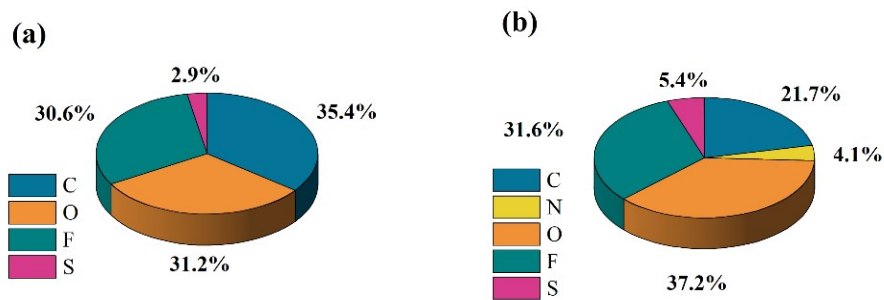

Fig. S11 Relative amount of different elements originated from the EDS analysis of the cycled Li surfaces in different batteries, (a) Li|PVDF|Li battery from Fig. S9, (b) Li|PVDF-5BFO|Li battery from Fig. S10

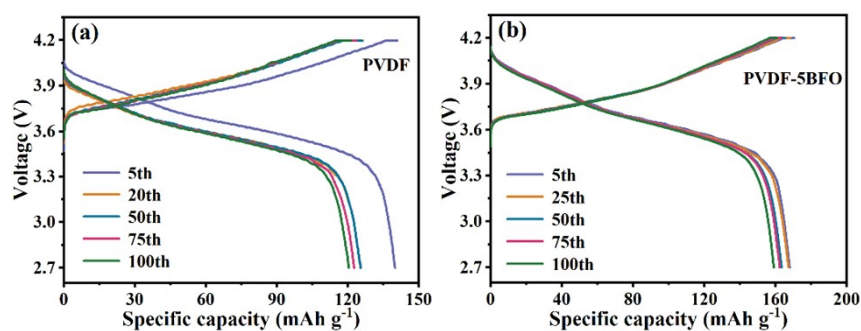

Fig. S12 Charge-discharge voltage profiles after different cycles at 0.1C, (a) Li|PVDF|NCM811 battery, (b) Li|PVDF-5BFO|NCM811 battery

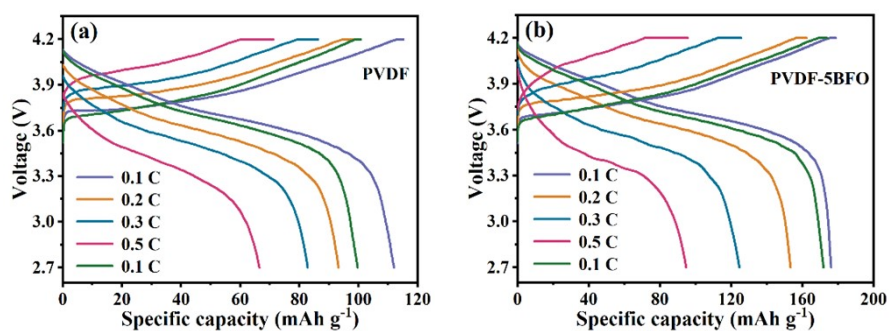

Fig. S13 Charge-discharge voltage profiles at different C-rates, (a) Li|PVDF|NCM811 battery, (b) Li|PVDF-5BFO|NCM811 battery

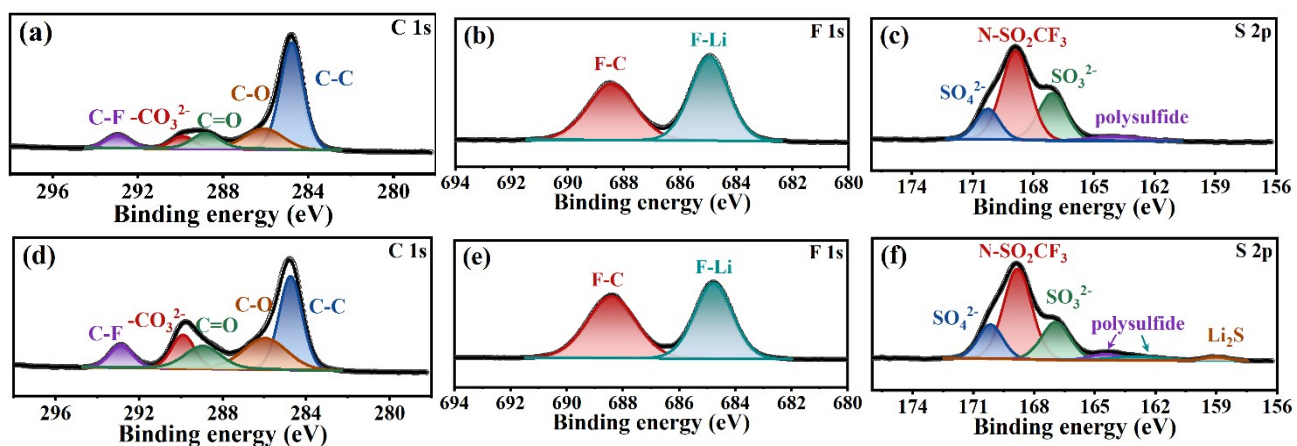

Fig. S14 XPS analysis of cycled Li metal in Li|CPE|NCM811 batteries, (a) C 1s, (b) F 1s, and (c) S 2p XPS spectra of cycled Li anode from Li|PVDF| NCM811 battery, (d) C 1s, (e) F 1s, and (f) S 2p XPS spectra of cycled Li anode from Li|PVDF-5BFO|NCM811 battery

Table S1 Cycling performance of PVDF-based electrolytes incorporated different inorganic fillers

| Filler tape                                               | Cathode             | C rate | Specific capacity | Cycle number | Capacity retention | Temperature | Ref.      |
|-----------------------------------------------------------|---------------------|--------|-------------------|--------------|--------------------|-------------|-----------|
| LALZO                                                     | NCM811              | 0.1    | 160.92            | 100          | 92 %               | RT          | S1        |
| LALZO                                                     | NCM811              | 0.2    | 144.70            | 100          | 85%                | RT          | S1        |
| V <sub>2</sub> O <sub>5</sub>                             | NCM811              | 0.5    | 178.50            | 280          | 70%                | RT          | S2        |
| LLZTNO                                                    | NCM811              | 0.3    | 137.10            | 80           | -                  | RT          | S3        |
| LATP                                                      | NCM622              | 0.5    | 150.00            | 500          | 80%                | 30          | S4        |
| LLTO/PPC                                                  | NCM622              | 0.5    | 168.00            | 100          | 84%                | RT          | S5        |
| APTES-LATP                                                | NCM622              | 0.5    | 118.00            | 300          | 84%                | 40          | S6        |
| (Mg,Al) <sub>2</sub> Si <sub>4</sub> O <sub>10</sub> (OH) | NCM111              | 0.3    | 121.40            | 200          | 97%                | RT          | S7        |
| Li <sub>3</sub> InCl <sub>6</sub>                         | LiFePO <sub>4</sub> | 0.1    | 161.80            | 200          | 82%                | RT          | S8        |
| LALZO/h-BN                                                | LiFePO <sub>4</sub> | 0.2    | 131.00            | 100          | 92%                | RT          | S9        |
| BiFeO <sub>3</sub>                                        | NCM811              | 0.1    | 168.65            | 100          | 94%                | RT          | This work |
| BiFeO <sub>3</sub>                                        | NCM811              | 0.3    | 144.89            | 400          | 89%                | RT          | This work |

RT: room temperature (25 °C)

## References

- [S1] S. L. Beshahwured, Y. S. Wu, S. H. Wu, W. C. Chien, R. Jose, S. J. Lue and C. C. Yang, *Electrochim. Acta*, 2021, **366**, 137348.
- [S2] T. Feng, Y. B. Hu, L. Xu, J. Q. Huang, S. B. Hu, L. F. Zhang and L. L. Luo, *Materials Today Energy*, 2022, **28**, 101062.
- [S3] X. Song, T. H. Zhang, S. F. Huang, J. S. Mi, Y. D. Zhang, J. Travas-Sejdic, A. P. Turner, W. Gao and P. Cao, *J. Power Sources*, 2023, **564**, 232849.
- [S4] L. Liu, D. C. Zhang, J. W. Zhao, J. D. Shen, F. K. Li, Y. Yang, Z. B. Liu, W. X. He, W. M. Zhao and J. Liu, *ACS Applied Energy Materials*, 2022, **5**, 2484-2494.
- [S5] L. Zhu, H. B. Xie, W. J. Zheng and K. Zhang, *Electrochim. Acta*, 2022, **435**, 141384.
- [S6] G. M. Overhoff, M. Y. Ali, J. P. Brinkmann, P. Lennartz, H. Orthner, M. Hammad, H. Wiggers, M. Winter and G. Brunklaus, *ACS Appl. Mater. Interfaces*, 2022, **14**, 53636-53647.
- [S7] P. C. Yao, B. Zhu, H. W. Zhai, X. B. Liao, Y. X. Zhu, W. H. Xu, Q. Cheng, C. Jayyosi, Z. Li, J. Zhu, K. M. Myers, X. Chen and Y. Yang, *Nano Lett.*, 2018, **18**, 6113-6120.
- [S8] H. Li, G. Du, H. Liang, Q. Su, D. Han, W. Zhao, M. Zhang, S. Ding and B. Xu, *J. Alloys Compd.*, 2023, **969**, 172418.
- [S9] J. H. Kim, D. H. Park, J. S. Jang, J. H. Shin, M. C. Kim, S. B. Kim, S. H. Moon, S. N. Lee and K. W. Park, *Chem. Eng. J.*, 2022, **446**, 137035.
